# Supplementary material for: Automated extraction of synthesis parameters of pulsed laser-deposited materials from scientific literature
Source: Royal Society of Chemistry journal article supplement (doi:10.1039/d4dd00051j), 2024-01-01
Supplement: d4dd00051j1.pdf [file d4dd00051j1.pdf]

## Supplementary Information

### Automated Extraction of Synthesis Parameters of Pulsed Laser-Deposited Materials from Scientific Literature

Rajan Kumar,<sup>a</sup> Ablokit Joshi<sup>a</sup>, Salman A. Khan,<sup>b</sup> Shikhar Misra<sup>a</sup>

<sup>a</sup>Indian Institute of Technology Kanpur, Kalyanpur, Kanpur, Uttar Pradesh 208016

<sup>b</sup>Delaware Energy Institute, University of Delaware, 221 Academy Street, Newark, Delaware

19716, United States

Table 1: F1 scores for the individual entities on the validation dataset for the individual epochs using the MatSciBERT architecture.

| Epoch | Energy   | Freq     | Mat      | O2 Pp    | Substr   | Temp     | Wave Lt  | Macro F1 | Micro F1 |
|-------|----------|----------|----------|----------|----------|----------|----------|----------|----------|
| 1     | 0        | 0        | 40       | 33.64486 | 0        | 32.83582 | 0        | 0.152115 | 0.282178 |
| 2     | 86.66667 | 95.45455 | 73.29843 | 81.72043 | 41.17647 | 76.66667 | 76.19048 | 0.75882  | 0.767123 |
| 3     | 75.40984 | 100      | 62.9108  | 84.21053 | 43.24324 | 76.66667 | 80       | 0.746344 | 0.729335 |
| 4     | 83.87097 | 100      | 71.57895 | 88.17204 | 36.36364 | 75.86207 | 80       | 0.765497 | 0.765101 |
| 5     | 83.87097 | 100      | 68.68687 | 85.71429 | 35       | 76.66667 | 81.81818 | 0.759653 | 0.755408 |
| 6     | 86.15385 | 97.87234 | 66.66667 | 85.41667 | 20       | 77.04918 | 81.81818 | 0.735681 | 0.733119 |
| 7     | 90.625   | 97.87234 | 69.94536 | 89.13044 | 33.33333 | 77.31092 | 83.72093 | 0.774198 | 0.772881 |
| 8     | 90.625   | 100      | 66.66667 | 85.71429 | 27.77778 | 77.31092 | 80       | 0.754421 | 0.754153 |
| 9     | 87.5     | 100      | 70.65217 | 86.66667 | 25.64103 | 68.8     | 85       | 0.748943 | 0.748299 |
| 10    | 90.625   | 100      | 72.72727 | 86.95652 | 41.86047 | 76.66667 | 83.72093 | 0.789367 | 0.782178 |
| 11    | 87.5     | 100      | 69.14894 | 84.44444 | 30       | 77.31092 | 85.71429 | 0.763027 | 0.760611 |
| 12    | 90.625   | 100      | 69.43005 | 86.95652 | 28.57143 | 76.66667 | 83.72093 | 0.765672 | 0.763333 |
| 13    | 90.625   | 100      | 70.40816 | 86.02151 | 28.57143 | 76.66667 | 81.81818 | 0.763016 | 0.763636 |
| 14    | 90.625   | 100      | 70.76923 | 86.02151 | 29.26829 | 76.66667 | 83.72093 | 0.767245 | 0.767442 |
| 15    | 90.625   | 100      | 70.76923 | 86.02151 | 25       | 76.66667 | 83.72093 | 0.761148 | 0.765391 |

Table 2: F1 scores for the individual entities on the validation dataset for the individual epochs using the MatSciBERT -CRF architecture.

| Epoch | Energy   | Freq     | Mat      | O2 Pp    | Substr   | Temp     | Wave Lt  | Macro F1 | Micro F1 |
|-------|----------|----------|----------|----------|----------|----------|----------|----------|----------|
| 1     | 43.24324 | 32.09877 | 65.84867 | 60.15038 | 33.33333 | 73.80952 | 65.88235 | 0.534809 | 0.605505 |
| 2     | 88.88889 | 98.92473 | 69.1358  | 75.94937 | 58.22785 | 78.125   | 83.16832 | 0.789171 | 0.770677 |
| 3     | 87.7193  | 98.92473 | 73.36449 | 77.01863 | 56.47059 | 84.21053 | 86.86869 | 0.806539 | 0.79058  |
| 4     | 80.99174 | 98.92473 | 73.81546 | 77.70701 | 54.54546 | 84.87805 | 84       | 0.792661 | 0.784549 |
| 5     | 90.09009 | 98.9011  | 76.29428 | 77.41936 | 60.97561 | 81.63265 | 84.78261 | 0.814422 | 0.802559 |
| 6     | 85.2459  | 98.92473 | 74.24242 | 77.98742 | 56.84211 | 84       | 82.35294 | 0.799422 | 0.788346 |
| 7     | 89.2562  | 98.92473 | 73.11828 | 75.64103 | 54.94506 | 84.87805 | 82.82828 | 0.799417 | 0.788039 |
| 8     | 85.95041 | 98.92473 | 73.82199 | 76.43312 | 55.81395 | 83.74384 | 80       | 0.792412 | 0.784656 |
| 9     | 89.2562  | 98.92473 | 75.26316 | 78.48101 | 54.73684 | 84.72906 | 82.69231 | 0.805833 | 0.797227 |
| 10    | 88.52459 | 98.92473 | 74.33155 | 77.70701 | 60       | 84.72906 | 82.82828 | 0.810065 | 0.799645 |
| 11    | 88.52459 | 98.92473 | 76.13941 | 78.48101 | 58.42697 | 81.15942 | 83.49515 | 0.807359 | 0.798253 |
| 12    | 88.52459 | 98.92473 | 75       | 76.43312 | 58.06452 | 84.72906 | 82.69231 | 0.80624  | 0.796491 |
| 13    | 86.17886 | 98.92473 | 76.43979 | 77.21519 | 55.55556 | 81.33971 | 84.31373 | 0.799954 | 0.793431 |
| 14    | 86.17886 | 98.92473 | 76.08696 | 77.21519 | 60       | 81.15942 | 84.31373 | 0.805541 | 0.795793 |
| 15    | 86.88525 | 98.92473 | 75.2     | 77.21519 | 56.17978 | 81.15942 | 84.31373 | 0.799826 | 0.790576 |

Table 3: F1 scores for the individual entities on the validation dataset for the individual epochs using the MatSciBERT -BiLSTM-CRF architecture.

| Epoch | Energy   | Freq     | Mat      | O2 Pp    | Substr   | Temp     | Wave Lt  | Macro F1 | Micro F1 |
|-------|----------|----------|----------|----------|----------|----------|----------|----------|----------|
| 1     | 8.108108 | 7.792208 | 66.66667 | 15.95745 | 28.57143 | 16.04938 | 7.594937 | 0.215343 | 0.36413  |
| 2     | 84.29752 | 98.92473 | 73.51351 | 77.01863 | 51.06383 | 71.28713 | 79.61165 | 0.76531  | 0.755245 |
| 3     | 86.88525 | 98.92473 | 70.50691 | 77.30061 | 52.27273 | 83.41232 | 83.16832 | 0.789244 | 0.772277 |
| 4     | 85.71429 | 98.92473 | 72.01947 | 77.5     | 56.81818 | 83.49515 | 77.77778 | 0.788928 | 0.776846 |
| 5     | 90       | 98.92473 | 75.54348 | 79.24528 | 56.47059 | 80.97561 | 82.82828 | 0.805697 | 0.797166 |
| 6     | 86.61417 | 98.92473 | 73.60406 | 79.24528 | 53.7037  | 80.38278 | 78.89908 | 0.787677 | 0.775646 |
| 7     | 88.70968 | 96.77419 | 74.86911 | 77.5     | 54       | 82.85714 | 79.20792 | 0.791311 | 0.784615 |
| 8     | 90.90909 | 98.92473 | 73.62924 | 80       | 56.47059 | 83.25359 | 81.5534  | 0.806772 | 0.795494 |
| 9     | 90       | 98.92473 | 74.93404 | 78.26087 | 58.94737 | 82.17822 | 82.69231 | 0.808482 | 0.795494 |
| 10    | 90.16393 | 98.92473 | 73.17073 | 80       | 54.94506 | 82.75862 | 82.69231 | 0.803793 | 0.791594 |
| 11    | 89.43089 | 98.92473 | 73.19588 | 80       | 54.73684 | 83.90244 | 81.90476 | 0.802994 | 0.790419 |
| 12    | 88.70968 | 98.92473 | 72.48677 | 78.75    | 50.54945 | 83.90244 | 81.13208 | 0.792079 | 0.78306  |
| 13    | 88.70968 | 98.92473 | 72.72727 | 78.26087 | 53.33333 | 82.52427 | 82.69231 | 0.795961 | 0.783646 |
| 14    | 89.43089 | 96.77419 | 74.27056 | 77.5     | 53.93258 | 82.92683 | 82.69231 | 0.796468 | 0.788879 |
| 15    | 88.70968 | 98.92473 | 73.74005 | 78.75    | 56.17978 | 82.92683 | 82.69231 | 0.802748 | 0.791667 |
